# Supplementary material for: Impact of Access Site on Periprocedural Bleeding and Cerebral and Coronary Events in High-Bleeding-Risk Percutaneous Coronary Intervention: Findings from the RIVA-PCI Trial
Source: Springer Nature journal article supplement (doi:10.1007/s40119-023-00343-4), 2023-12-06
Supplement: MOESM1 [file 26499336]

# Impact of Access Site on Periprocedural Bleeding, Cerebrovascular, and Coronary Events in High-Bleeding-Risk Percutaneous Coronary Intervention: Findings from the RIVA-PCI Trial

Martin Borlich<sup>1</sup> · Uwe Zeymer<sup>2,3</sup> · Harm Wienbergen<sup>4</sup> · Hans-Peter Hobbach<sup>5</sup> · Alessandro Cuneo<sup>6</sup> · Raffi Bekerredjian<sup>7</sup> · Oliver Ritter<sup>8</sup> · Birgit Hailer<sup>9</sup> · Klaus Hertting<sup>10</sup> · Marcus Hennersdorf<sup>11</sup> · Werner Scholtz<sup>12</sup> · Peter Lanzer<sup>13</sup> · Harald Mudra<sup>14</sup> · Markus Schwefer<sup>15</sup> · Peter-Lothar Schwimbeck<sup>16</sup> · Christoph Liebetrau<sup>17</sup> · Holger Thiele<sup>18</sup> · Christoph Claas<sup>3</sup> · Thomas Riemer<sup>3</sup> · Ralf Zahn<sup>2</sup> · Leon Iden<sup>1</sup> · Gert Richardt<sup>1</sup> · Ralph Toelg<sup>1,19</sup>

<sup>1</sup> Segeberger Kliniken GmbH, Bad Segeberg, Germany; <sup>2</sup> Medizinische Klinik B, Klinikum Ludwigshafen, Ludwigshafen, Germany; <sup>3</sup> Institut für Herzinfarktforschung Ludwigshafen, Ludwigshafen, Germany; <sup>4</sup> Klinikum Links der Weser Bremen, Bremen, Germany; <sup>5</sup> Kreisklinikum Siegen, Siegen, Germany; <sup>6</sup> Krankenhaus und MVZ Maria-Hilf Stadtlohn, Stadtlohn, Germany; <sup>7</sup> Robert-Bosch-Klinikum, Stuttgart, Germany; <sup>8</sup> Klinikum Brandenburg Havel, Brandenburg, Germany; <sup>9</sup> Katholische Kliniken Essen-Nord-West gGmbH, Essen, Germany; <sup>10</sup> Krankenhaus Buchholz und Winsen GmbH, Buchholz, Germany; <sup>11</sup> SLK-Kliniken Heilbronn GmbH, Heilbronn, Germany; <sup>12</sup> Herz- und Diabeteszentrum, Bad Oeynhausen, Germany; <sup>13</sup> Gesundheitszentrum Bitterfeld Wolfen, Bitterfeld, Germany; <sup>14</sup> Städtisches Krankenhaus Neuperlach-München, München, Germany; <sup>15</sup> Elblandklinikum Riesa, Riesa, Germany; <sup>16</sup> Klinikum Leverkusen, Leverkusen, Germany; <sup>17</sup> Kerckhoff-Klinik GmbH, Bad Nauheim, Germany; <sup>18</sup> Herzzentrum Leipzig der Universität Leipzig, Leipzig, Germany, <sup>19</sup> Medizinische Fakultät der Christian-Albrechts-Universität zu Kiel, Kiel, Germany

**Key words:** RIVA PCI, radial access, in-hospital bleeding, access site, percutaneous coronary intervention, dual therapy, high-bleeding-risk

**All authors declare:** The article is original, with no portion under simultaneous consideration for publication elsewhere or previously published. All authors have read and approved the submission.

**Address for correspondence:** Martin Borlich, MD  
Heart Center, Segeberger Kliniken GmbH, Bad Segeberg, Germany  
Am Kurpark 1, Bad Segeberg, Schleswig-Holstein, 23795, Germany  
TEL: +49-4551-802-4802; FAX: +49-4552-802-4805  
E-mail: martin.borlich@segebergerkliniken.de

## Supplementary Appendix

This appendix has been provided by the authors to give readers additional information about the work.

**Table S1. Data on periprocedural antithrombotics**

|                              | <b>TFA</b>       | <b>TRA</b>       | <b>p-value</b> |
|------------------------------|------------------|------------------|----------------|
| Unfractionated Heparin       | 84.3 % (720/854) | 83.4 % (652/782) | 0.61           |
| Low molecular weight Heparin | 8.1 % (69/854)   | 11.6 % (91/782)  | < 0.05         |
| Bivalirudin                  | 0.0 % (0/854)    | 0.1 % (1/782)    | 0.30           |
| ASA                          | 100 % (854/854)  | 100 % (782/782)  | ---            |
| GP IIb/IIIa inhibitor        | 2.9 % (25/854)   | 1.8 % (14/782)   | 0.13           |
| Cangrelor                    | 0.6 % (5/854)    | 0.3 % (2/782)    | 0.31           |
| Oral P2Y12 inhibitors        | 72.5 % (619/854) | 64.3 % (503/782) | < 0.001        |
| Clopidogrel                  | 63.9 % (546/854) | 57.9 % (453/782) | < 0.05         |
| Prasugrel                    | 3.4 % (29/854)   | 1.4 % (11/782)   | < 0.01         |
| Ticagrelor                   | 5.5 % (47/854)   | 5.2 % (41/782)   | 0.82           |

**Table S2. Data on coronary intervention**

|                                     | <b>TFA</b>       | <b>TRA</b>       | <b>p-value</b> |
|-------------------------------------|------------------|------------------|----------------|
| <b>Data on CAD diagnosis</b>        | 100 % (854/854)  | 100 % (782/782)  |                |
| 1-vessel CAD                        | 24.5 % (209/854) | 30.6 % (239/782) | < 0.01         |
| 2-vessel CAD                        | 27.8 % (237/854) | 32.5 % (254/782) | < 0.05         |
| 3-vessel CAD                        | 47.8 % (408/854) | 37.0 % (289/782) | < 0.0001       |
| <b>Data on vessels treated</b>      | 100 % (854/854)  | 100 % (782/782)  |                |
| LAD                                 | 46.3 % (395/854) | 44.5 % (348/782) | 0.48           |
| RCA                                 | 34.1 % (291/854) | 31.8 % (249/782) | 0.34           |
| RCX                                 | 25.8 % (220/854) | 27.7 % (217/782) | 0.36           |
| LM                                  | 9.1 % (78/854)   | 5.9 % (46/782)   | < 0.05         |
| CABG                                | 3.7 % (32/854)   | 0.8 % (6/782)    | < 0.0001       |
| <b>Stents implanted per patient</b> |                  |                  |                |
| One stent implanted                 | 61.1 % (522/854) | 74.8 % (585/782) | < 0.0001       |
| Two stents implanted                | 19.8 % (169/854) | 15.9 % (124/782) | < 0.05         |
| Three or more stents implanted      | 19.1 % (163/854) | 9.3 % (73/782)   | < 0.0001       |
| <b>Stent types per patient</b>      |                  |                  |                |
| DES                                 | 98.4 % (840/854) | 99.1 % (775/782) | 0.18           |
| BMS                                 | 0.6 % (5/854)    | 0.0 % (0/782)    | < 0.05         |
| Other                               | 1.4 % (12/854)   | 0.9 % (7/782)    | 0.34           |
